# Supplementary material
Source: publisher site journal article supplement (https://www.dovepress.com/article/367494)
Supplement: Supplementary file 1 [file get_supplementary_file.php]

**Figure S1 :**

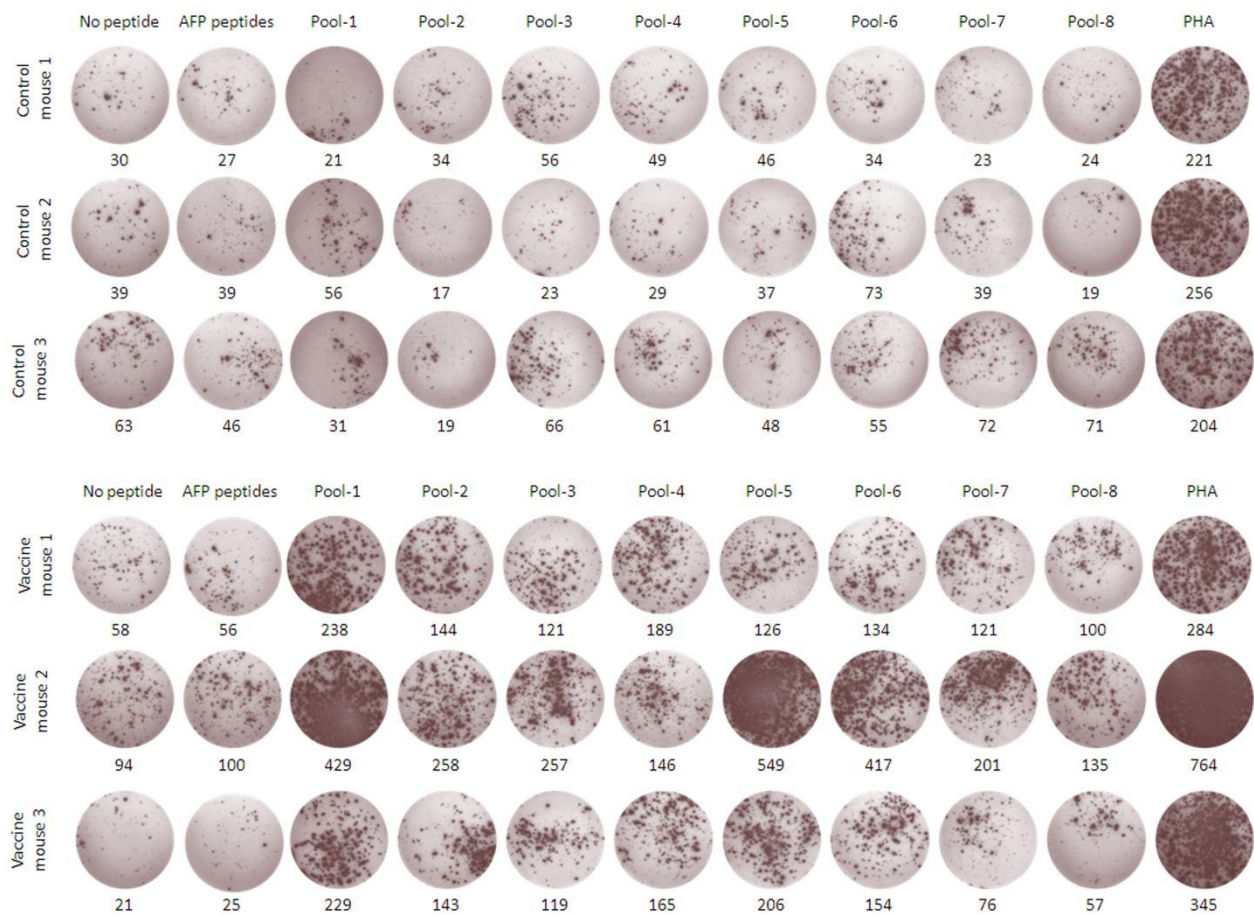

**Figure S1: IFN- $\gamma$  ELISPOT spot plots against the individual peptide pools in hybrid mice.** Splenocytes from each primed mouse were harvested 7 days after the final booster and *ex vivo* stimulated with 8 different peptide pools covering the 31 VEPs, AFP peptides (AFP<sub>158-166</sub>, AFP<sub>424-432</sub>) as non-specific control, PBS without peptide as a negative control, or PHA as a positive control, followed by IFN- $\gamma$  ELISPOT. Control group: poly(I:C) plus normal saline; Vaccine group: peptides-PEG-lipid-exosomes plus poly(I:C). Three mice were tested in each group.

Figure S2 :

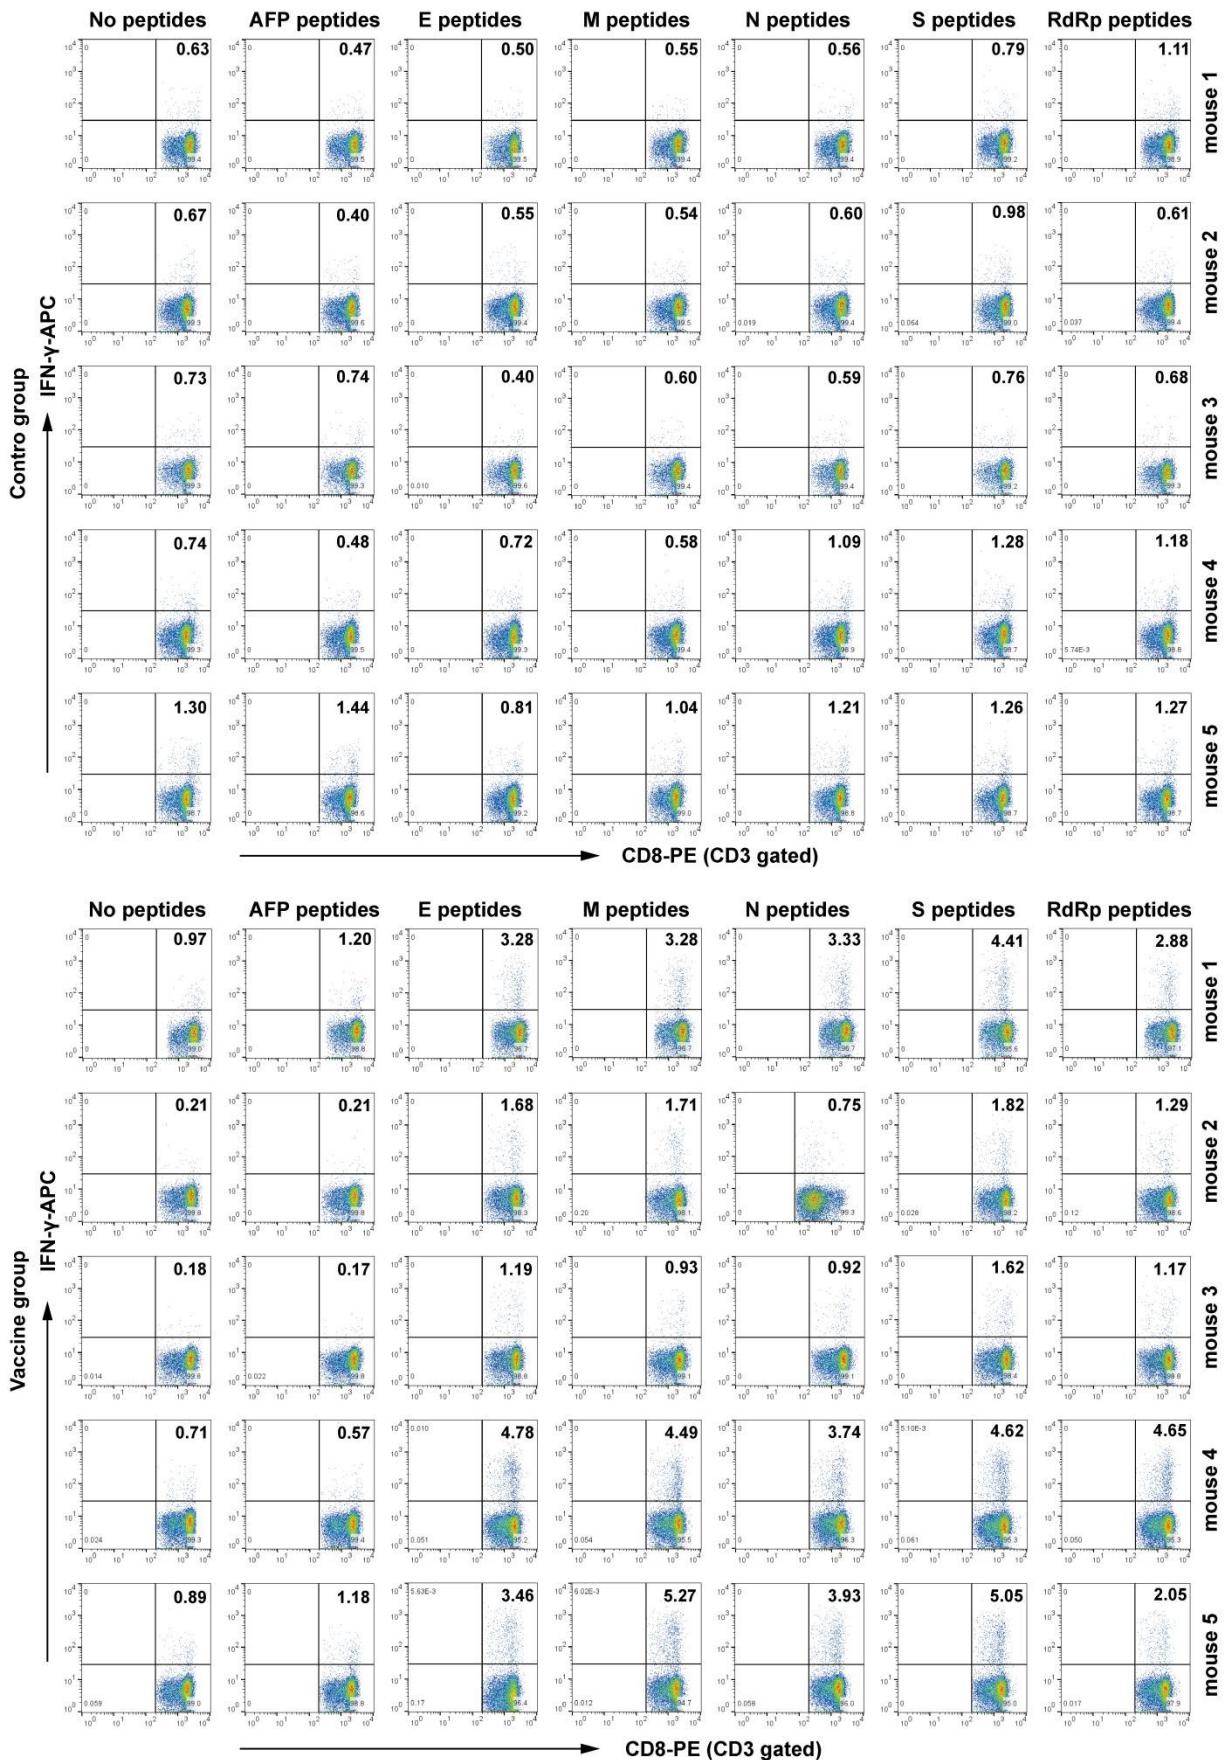

**Figure S2: Flow plots of IFN- $\gamma$  ICS responding to the individual peptide pools in hybrid mice.** Splenocytes from each primed mouse were harvested 7 days after the last booster and *ex vivo* stimulated with 5 different peptide pools, AFP peptides (AFP<sub>158-166</sub>, AFP<sub>424-432</sub>) as irrelevant control, PBS without peptide as a negative control, or PHA as a positive control, and followed by IFN- $\gamma$  ICS. The data in right upper quadrant indicate the percentages of IFN- $\gamma$ <sup>+</sup> T cells in CD3<sup>+</sup>/CD8<sup>+</sup> cell populations. Control group: poly(I:C) plus normal saline; Vaccine group: peptides-PEG-lipid-exosomes plus adjuvant poly(I:C). Five mice were tested in each group.

**Figure S3 :**

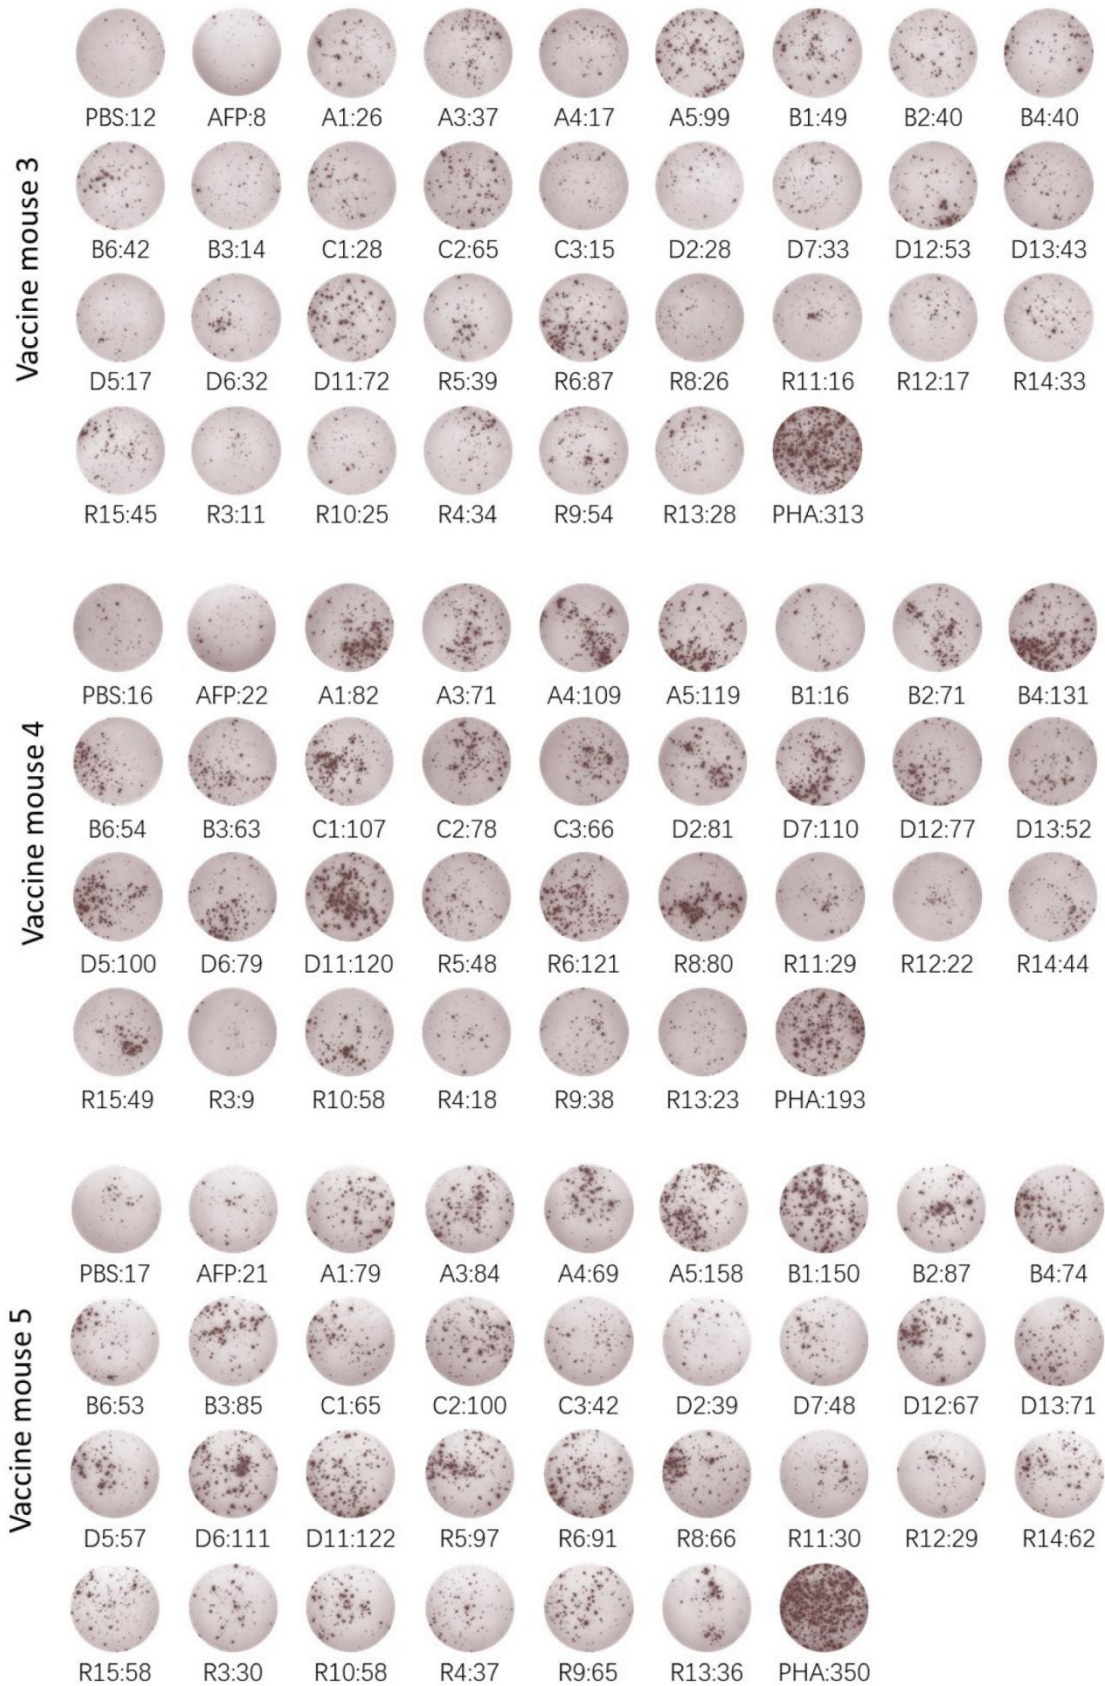

**Figure S3 ( continued)**

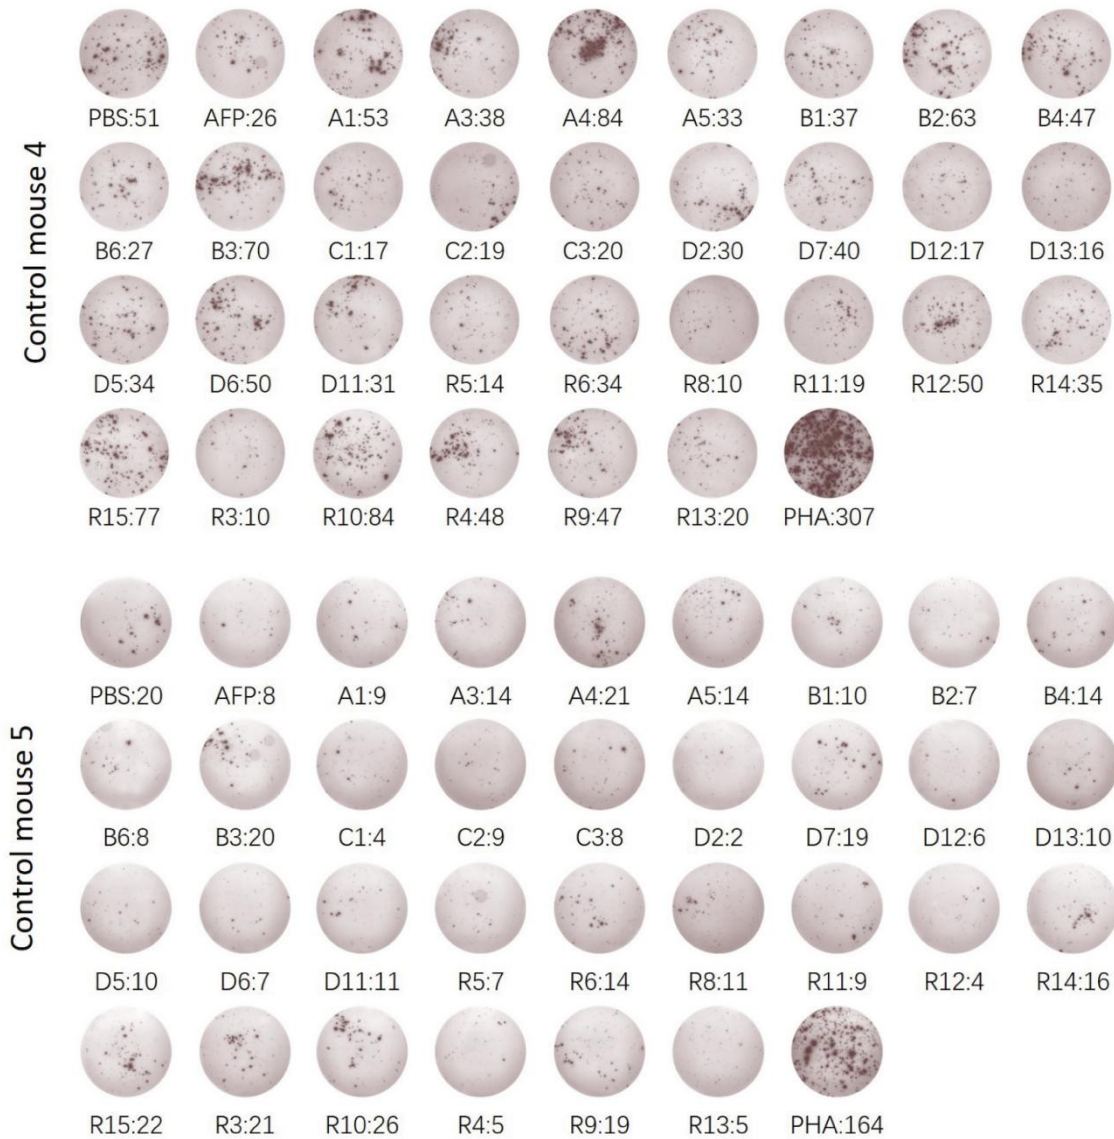

**Figure S3: IFN- $\gamma$  ELISPOT spot plots against each peptide in hybrid mice.** Splenocytes from each primed hybrid mouse were harvested 7 days after the last booster and *ex vivo* stimulated with 8 different peptide pools covering the 31 VEPs or with AFP peptides (AFP<sub>158-166</sub>, AFP<sub>424-432</sub>), PBS as a negative control, or PHA as a positive control, and followed by IFN- $\gamma$  ELISPOT. Control group: poly(I:C) in normal saline; Vaccine group: peptides-PEG-lipid-exosomes with poly(I:C). Three mice in Vaccine group and two mice from Control group were tested.
